# Supplementary material
Source: ML conference proceedings conference paper supplement (https://proceedings.mlr.press/v139/fotakis21a.html)
Supplement: Supplementary file [file fotakis21a-supp.pdf]

## Appendix

### A. Proof of Theorem 1

**Problem 2** ( $k$  – CenterUniform). *Given a uniform metric space  $d : V \times V \mapsto \mathbb{R}_{\geq 0}$  ( $d(u, v) = 1$  in case ( $u \neq v$ )) and a set of requests  $R_1, \dots, R_m \subseteq V$ . Select  $F \subseteq V$  such as  $|F| = k$  and  $\sum_{s=1}^m C_{R_s}(F)$  is minimized where  $p$  is  $\infty$ .*

**Lemma 6.** *Any  $c$ -approximation algorithm for  $k$  – CenterUniform implies a  $c$ -approximation algorithm for Min –  $p$  – Union.*

*Proof.* Given the collection  $U = \{S_1, \dots, S_m\}$  of the Min –  $p$  – Union, we construct a uniform metric space  $V$  of size  $m$ , where each node of  $V$  corresponds to a set  $S_i$ .

For each elements  $e \in E$  of the Min –  $p$  – Union we construct a request  $R_e \subseteq V$  for the  $k$  – CenterUniform that is composed by the nodes corresponding to the sets  $S_i$  that contain  $e$ . Observe that due to the uniform metric and the fact that  $p = \infty$ , for any  $V' \subseteq V$

$$\sum_{e \in E} C_{R_e}(V') = |\cup_{S_i \notin V'} S_i|$$

□

**Lemma 7.** *Any polynomial time  $c$ -regret algorithm for the online  $k$ -Center implies a  $(c + 1)$ -approximation algorithm (offline) for the  $k$  – CenterUniform.*

*Proof.* Let assume that there exists a polynomial-time online learning algorithm such that for any request sequence  $R_1, \dots, R_T$ ,

$$\sum_{t=1}^T \mathbb{E}[C_{R_t}(F_t)] \leq c \cdot \min_{|F^*|=k} \sum_{t=1}^T \mathbb{E}[C_{R_t}(F^*)] + \Theta(\text{poly}(n, D) \cdot T^\alpha)$$

for some  $\alpha < 1$ .

Now let the requests lie on the uniform metric,  $p = \infty$  and that the adversary at each round  $t$  selects uniformly at random one of the requests  $R_1, \dots, R_m$  that are given by the instance of  $k$  – CenterUniform. In this case the above equation takes the following form,

$$\sum_{t=1}^T \frac{1}{m} \sum_{s=1}^m \mathbb{E}[C_{R_s}(F_t)] \leq c \frac{T}{m} \sum_{s=1}^m \mathbb{E}[C_{R_s}(\text{OPT}^*)] + \Theta(n^\beta \cdot T^\alpha)$$

where  $\text{OPT}^*$  is the optimal solution for the instance of  $k$  – CenterUniform and  $F_t$  is the random set that the online algorithm selects at round  $t$ .

Now consider the following randomized algorithm for the  $k$  – CenterUniform.

1. Select uniformly at random a  $t$  from  $\{1, \dots, T\}$ .
2. Select a set  $F \subseteq V$  according to the probability distribution  $F_t$ .

The expected cost of the above algorithm, denoted by  $\mathbb{E}[\text{ALG}]$ , is

$$\begin{aligned} \frac{1}{T} \sum_{t=1}^T \sum_{i=1}^m \mathbb{E}_{F \sim F_t} [C_{R_i}(F)] &= m \cdot \left( \frac{1}{T} \sum_{t=1}^T \sum_{i=1}^m \frac{1}{m} \mathbb{E}_{F \sim F_t} [C_{R_i}(F)] \right) \\ &\leq \frac{c \cdot m}{T} \cdot \frac{T}{m} \sum_{i=1}^m C_{R_i}(\text{OPT}^*) \\ &\quad + \Theta\left(\frac{m \cdot n^\beta}{T^{1-\alpha}}\right) \end{aligned}$$

By selecting  $T = \Theta(m^{\frac{1}{1-\alpha}} \cdot n^{\frac{\beta}{1-\alpha}})$  we get that  $\mathbb{E}[\text{ALG}] \leq (c + 1) \cdot \text{OPT}^*$ . □

## B. Omitted Proof of Section 3

### B.1. Proof of Lemma 2

The Langragian of the convex program of Definition 2 is,

$$\begin{aligned}
 L(\beta, y, x, A, k, \lambda) &= \left( \sum_{j \in R} \beta_j^p \right)^{1/p} \\
 &+ \sum_{j \in R} \lambda_j \cdot (d_{ij} x_{ij} - \beta_j) + \sum_{j \in R} A_j \cdot \left( 1 - \sum_{i \in V} x_{ij} \right) \\
 &+ \sum_{i \in V} \sum_{j \in V} k_{ij} \cdot (x_{ij} - y_i) - \sum_{i \in V} \sum_{j \in R} \mu_{ij} \cdot x_{ij}
 \end{aligned}$$

Rearranging the terms we get,

$$\begin{aligned}
 L(\beta, y, x, A, k, \lambda) &= \sum_{j \in R} A_j - \sum_{i \in V} \sum_{j \in R} k_{ij} \cdot y_i \\
 &+ \sum_{i \in V} \sum_{j \in R} x_{ij} \cdot (k_{ij} - \mu_{ij} + d_{ij} \cdot \lambda_j - A_j) \\
 &+ \left( \sum_{j \in R} \beta_j^p \right)^{1/p} - \sum_{j \in R} \lambda_j \cdot \beta_j
 \end{aligned}$$

In order for the function  $g(A, k, \lambda) = \min_{\beta, y, x, M^+, M^-} L(\beta, y, x, A, k, \lambda)$  to get a finite value the following constraints must be satisfied,

- $k_{ij} + d_{ij} \cdot \lambda_j - A_j = \mu_{ij}$
- $\|\lambda\|_p^* \leq 1$  since otherwise  $\left( \sum_{j \in R} \beta_j^p \right)^{1/p} - \sum_{j \in R} \lambda_j \cdot \beta_j$  can become  $-\infty$ .

Using the fact that the Lagrangian multipliers  $\mu_{ij} \geq 0$ , we get the constraints of the convex program of Lemma 2. The objective comes from the fact that once  $g(A, k, \lambda)$  admits a finite value then  $g(A, k, \lambda) = \sum_{j \in R} A_j - \sum_{i \in V} \sum_{j \in R} k_{ij} \cdot y_i$ .

### B.2. Proof of Lemma 3

Let  $\lambda_j^*, A_j^*, k_{ij}^*$  denote the values of the respective variables in the optimal solution of the convex program of Lemma 2 formulated with respect to the vector  $y = (y_1, \dots, y_n)$ . Respectively consider  $\lambda_j', A_j', k_{ij}'$  denote the values of the respective variables in the optimal solutions of the convex program of Lemma 2 formulated with respect to the vector  $y' = (y'_1, \dots, y'_n)$ .

$$\text{FC}_R(y') = \sum_{j \in R} A_j' - \sum_{i \in V} \sum_{j \in R} k_{ij}' \cdot y_i' \quad (3)$$

$$\geq \sum_{j \in R} A_j^* - \sum_{i \in V} \sum_{j \in R} k_{ij}^* \cdot y_i' \quad (4)$$

$$= \sum_{j \in R} A_j^* - \sum_{i \in V} \sum_{j \in R} k_{ij}^* \cdot y_i' + \sum_{i \in V} \sum_{j \in R} k_{ij}^* \cdot y_i - \sum_{i \in V} \sum_{j \in R} k_{ij}^* \cdot y_i \quad (5)$$

$$= \text{FC}_R(y) + \sum_{i \in V} \sum_{j \in R} k_{ij}^* \cdot (y_i - y_i') \quad (6)$$

Equations 5 and 6 follow by strong duality, more precisely  $\text{FC}_R(y) = \sum_{j \in R} A_j^* - \sum_{i \in V} \sum_{j \in R} k_{ij}^* \cdot y_i$  since the convex program of Lemma 2 is the dual of the convex program the solution of which defines  $\text{FC}_R(y')$  (respectively for

$FC_R(y') = \sum_{j \in R} A_j - \sum_{i \in V} \sum_{j \in R} k'_{ij} \cdot y'_i$ . Equation 4 is implied by the fact that the solution  $(\lambda', k', A')$  is optimal when the objective function is  $\sum_{j \in R} A_j - \sum_{i \in V} \sum_{j \in R} k_{ij} \cdot y'_i$ . Notice that the constraints of the convex program in Lemma 2 do not depend on the  $y$ -values. As a result, the solution  $(\lambda^*, k^*, A^*)$  (that is optimal for the dual convex program formulated for  $y$ ) is feasible for the dual program formulated for the values  $y'$ . Thus Equation 4 follows by the optimality of  $(\lambda', k', A')$ .

Up next we prove the correctness of Algorithm 1. Notice that the the solution  $\beta, x$  that Algorithm 1 constructs is feasible for the primal convex program of Definition 2. We will prove that the dual solution that Algorithm 1 constructs is feasible for the dual of Lemma 2 while the exact same value is obtained.

- $\|\lambda\|_p^* = 1$ : It directly follows by the fact that  $\lambda_j = \left[ \frac{\beta_j}{\|\beta\|_p} \right]^{p-1}$  and  $\|\lambda\|_p^* = \left[ \sum_{j \in R} \lambda_j^{\frac{p}{p-1}} \right]^{\frac{p-1}{p}}$ .
- $\frac{d_{ij} \cdot \lambda_j + k_{ij}}{d_{ij}} \geq A_j$ : In case  $d_{ij} < D_j^*$ , Algorithm 1 implies that  $x_{ij} = y_i$  and the inequality directly follows. In case  $d_{ij} \leq D_j^*$  the inequality holds trivially since  $k_{ij} = 0$ .

Now consider the objective function,

$$\begin{aligned}
 \sum_{j \in R} A_j - \sum_{i \in V} \sum_{j \in R} y_i \cdot k_{ij} &= \sum_{j \in R} A_j - \sum_{j \in R} \sum_{i \in V_j^+} y_i \cdot k_{ij} \\
 &= \sum_{j \in R} \lambda_j \cdot D_j - \sum_{j \in R} \sum_{i \in V_j^+} y_i \left[ \lambda_j \cdot \frac{x_{ij}}{y_i} (D_j - d_{ij}) \right] \\
 &= \sum_{j \in R} \lambda_j \sum_{i \in V_j^+} d_{ij} \cdot x_{ij} \\
 &= \sum_{j \in R} \lambda_j \cdot \beta_j \\
 &= \left( \sum_{j \in R} \beta_j^p \right)^{1/p}
 \end{aligned} \tag{7}$$

where Equation 8 follows by the fact that  $x_{ij} = 0$  for all  $j \notin V_j^+$  and thus  $\sum_{j \in V_j^+} x_{ij} = 1$ . Finally notice that  $|\lambda_j| \leq 1$  and thus  $k_{ij} \leq D$  where  $D$  is the diameter of the metric space.

### B.3. Proof of Theorem 6

By Lemma 3,  $|g_i^t| = \left| - \sum_{j \in R^t} k_{ij}^* \right| \leq Dr$  since  $|R^t| \leq r$ . Applying Theorem 1.5 of (Hazan, 2016) we get that

$$\sum_{t=1}^T \sum_{i \in V} g_i^t (y_i^t - y_i^*) \leq \Theta \left( kDr \sqrt{\log nT} \right)$$

Applying Lemma 3 for  $y' = y^*$ ,

$$\sum_{t=1}^T (FC_{R_t}(y^t) - FC_{R_t}(y^*)) \leq \sum_{t=1}^T \sum_{i \in V} g_i^t (y_i^t - y_i^*) \leq \Theta \left( kDr \sqrt{\log nT} \right)$$

## C. Omitted Proof of Section 4

### C.1. Proof of Lemma 4

The following claim trivially follows by Step 10 of Algorithm 4.

**Claim 1.** For any node  $j \in V$ ,  $d(j, F_y) \leq 6k \cdot \beta_j^*$ .

We are now ready to prove the first item of Lemma 4. Let a request  $R \subseteq V$ ,

$$C_R(F_y) = \left( \sum_{j \in R} d(j, F_y)^p \right)^{1/p} \leq \left( \sum_{j \in R} (6k)^p \cdot \beta_j^{*p} \right)^{1/p} = 6k \cdot \left( \sum_{j \in R} \beta_j^{*p} \right)^{1/p}$$

We proceed with the second item of Lemma 4. For a given node  $j \in S$ , let  $B_j = \{i \in V : d_{ij} \leq 3k \cdot \beta_j^*\}$ . It is not hard to see that for any  $j \in F_y$ ,

$$\sum_{i \in B_j} y_i \geq 1 - \frac{1}{3k}$$

Observe that in case the latter is not true then  $\sum_{i \notin B_j} x_{ij}^* \geq \frac{1}{3k}$ , which would imply that  $\beta_j^* > \beta_j^*$ .

The second important step of the proof is that for any  $j, j' \in F_y$ ,

$$B_j \cap B_{j'} = \emptyset.$$

Observe that in case there was  $m \in B_j \cap B_{j'}$  would imply  $d(j, m) \leq 3k \cdot \beta_j^*$  and  $d(j', m) \leq 3k \cdot \beta_{j'}^*$ . By the triangle inequality we get  $d(j, j') \leq 6k \cdot \beta_{j'}^*$  (without loss of generality  $\beta_j^* \leq \beta_{j'}^*$ ). The latter contradicts with the fact that both  $j$  and  $j'$  belong in set  $F_y$ .

Now assume that  $|F_y| \geq k + 1$ . Then  $\sum_{i \in F_y} y_i \geq |F_y| \cdot (1 - \frac{1}{3k}) \geq (k + 1) \cdot (1 - \frac{1}{3k}) > k$ . But the latter contradicts with the fact that  $\sum_{i \in V} y_i = k$ . As a result,  $|F_y| \leq k$ .

## D. Omitted Proofs of Section 5

*Proof of Theorem 4.* To simplify notation the quantity  $\mathbb{E}_{F \sim \text{CL}(y_t)}[C_{R_t}(F)]$  is denoted as  $\mathbb{E}[C_{R_t}(F_t)]$ . At first notice that by the first case of Lemma 5, Algorithm 5 ensures that exactly  $k$  facilities are opened at each round  $t$ .

Concerning its overall expected connection cost we get,

$$\mathbb{E}[C_{R_t}(F_{y_t})] \leq \sum_{j \in R_t} \mathbb{E}[C_{\{j\}}(F_{y_t})] \leq 4 \sum_{j \in R_t} \text{FC}_{\{j\}}(y_t)$$

where the first inequality is due to the fact that  $\sum_{j \in R_t} d(j, F)^p \leq \left( \sum_{j \in R_t} d(j, F) \right)^p$  and the second is derived by applying the second case of Lemma 5. We overall get,

$$\begin{aligned} \sum_{t=1}^T \mathbb{E}[C_{R_t}(F_{y_t})] &\leq 4 \sum_{t=1}^T \sum_{j \in R_t} \text{FC}_{\{j\}}(y_t) \\ &\leq 4 \sum_{t=1}^T |R_t| \cdot \text{FC}_{R_t}(y_t) \\ &\leq 4r \min_{y^*} \sum_{t=1}^T \text{FC}_{R_t}(y^*) \\ &\quad + \Theta\left(kDr \sqrt{\log nT}\right) \\ &\leq 4r \min_{|F^*|=k} \sum_{t=1}^T \mathbb{E}[C_{R_t}(F^*)] \\ &\quad + \Theta\left(kDr \sqrt{\log nT}\right) \end{aligned} \tag{8}$$

where inequality 3 follows by the fact that  $\text{FC}_{\{j\}}(y) \leq \text{FC}_{\{R\}}(y)$  for all  $j \in R$  and the last two inequalities follow by Theorem 6 and Lemma 1 respectively.  $\square$
